# Supplementary material for: Caulerpin Mitigates Helicobacter pylori-Induced Inflammation via Formyl Peptide Receptors
Source: MDPI journal article supplement (doi:10.3390/ijms222313154), 2021-12-05
Supplement: s1 [file s1]

| <b>GENE</b>                                                                | <b>PRIMER</b>                                                            |
|----------------------------------------------------------------------------|--------------------------------------------------------------------------|
| <i>GAPDH (Glyceraldehyde-3-Phosphate Dehydrogenase)</i>                    | FW: 5'-CCTCTGACTTCAACAGCGACAC-3'<br>RW: 5'-CACCACCCTGTTGCTGTAGCCA-3'     |
| <i>TNF-<math>\alpha</math> (Tumor necrosis factor <math>\alpha</math>)</i> | FW: 5'-CCTGGTATGAGCCCATCTAT-3'<br>RW: 5'-ACAGGGCAATGATCCCAAAGTA-3'       |
| <i>IL8 (Interleukin 8)</i>                                                 | FW: 5'-ACTTAGATGTCAGTGCATAAAGAC-3'<br>RW: 5'-TTATGAATTCTCAGCCCTCTTCAA-3' |
| <i>IL6 (Interleukin 6)</i>                                                 | FW: 5'-CCACTCACCTCTTCAGAACG-3'<br>RW: 5'-CATCTTTGGAAGGTTTCAGGTTG-3'      |
| <i>SOD2 (Superoxide Dismutase 2)</i>                                       | FW: 5'-CTGATTTGGACAAGCAGCAA-3'<br>RW: 5'-CTGGACAAACCTCAGCCCTA-3'         |
| <i>p53 (Tumor Protein 53)</i>                                              | FW: 5'-AGAGTCTATAGGCCCAACCC-3'<br>RW: 5'-GCTCGACGCTAGGATCTGAC-3'         |
|                                                                            | <b>PROBE</b>                                                             |
| <i>FPR1 (Formyl Peptide Receptor 1)</i>                                    | Hs04235426_s1                                                            |
| <i>FPR2 (Formyl Peptide Receptor 2)</i>                                    | Hs02759175_s1                                                            |
| <i>FPR3 (Formyl Peptide Receptor 3)</i>                                    | Hs00266666_s1                                                            |
| <i>GAPDH (Glyceraldehyde-3-Phosphate Dehydrogenase)</i>                    | Hs02786624_g1                                                            |
| <i>CCL2 (C-C Motif Chemokine Ligand 2)</i>                                 | Hs00234140_m1                                                            |
| <i>CCL3 (C-C Motif Chemokine Ligand 3)</i>                                 | Hs00234142_m1                                                            |
| <i>CCL5 (C-C Motif Chemokine Ligand 5)</i>                                 | Hs99999048_m1                                                            |
| <i>CCL7 (C-C Motif Chemokine Ligand 7)</i>                                 | Hs00171147_m1                                                            |
| <i>CXCL2 (C-X-C Motif Chemokine Ligand 2)</i>                              | Hs00601975_m1                                                            |

**Table S1. Primers and probes used for RT-qPCR.**

| <b>Primary Antibodies</b>                                                                  | <b>Company</b>                                           | <b>Dilution</b> |
|--------------------------------------------------------------------------------------------|----------------------------------------------------------|-----------------|
| Vinculin                                                                                   | Santa Cruz Biotechnology; mouse monoclonal antibody      | 1:10000         |
| pI $\kappa$ B- $\alpha$ (ser32/36) (phospho Inhibitor of Nuclear Factor Kappa B $\alpha$ ) | Cell Signaling; rabbit monoclonal antibody               | 1:250           |
| I $\kappa$ B- $\alpha$ (C-21) (Inhibitor of Nuclear Factor Kappa B)                        | Santa Cruz biotechnology; mouse monoclonal antibody      | 1:250           |
| pERK1/2 (th202/tyr204) (phospho Extracellular signal-Regulated Kinases)                    | Cell Signaling; rabbit monoclonal antibody               | 1:1000          |
| ERK1/2 (C-9): sc-514302 (Extracellular signal-Regulated Kinases)                           | Santa Cruz biotechnology; rabbit monoclonal antibody     | 1:1000          |
| pAkt (ser473) (phospho protein kinase B)                                                   | Santa Cruz biotechnology; rabbit monoclonal antibody     | 1:500           |
| Akt1 (Protein kinase B)                                                                    | Millipore cat 07416 Lot 28745; mouse monoclonal antibody | 1:500           |
| pSTAT3 (tyr705) (phosphor Signal Transducer and Activator of Transcription 3)              | Cell Signaling; rabbit monoclonal antibody               | 1:500           |
| STAT3 (F-2): sc-8019 (Signal Transducer and Activator of Transcription 3)                  | Santa Cruz biotechnology                                 | 1:500           |
| <b>Secondary Antibodies</b>                                                                | <b>Company</b>                                           | <b>Dilution</b> |
| Goat Anti-Rabbit HRP                                                                       | sc-2027 Santa Cruz Biotechnology                         | 1:5000          |
| Goat Anti-Mouse HRP                                                                        | sc-2025 Santa Cruz Biotechnology                         | 1:5000          |

**Table S2. Antibodies used for Western Blot analysis.**

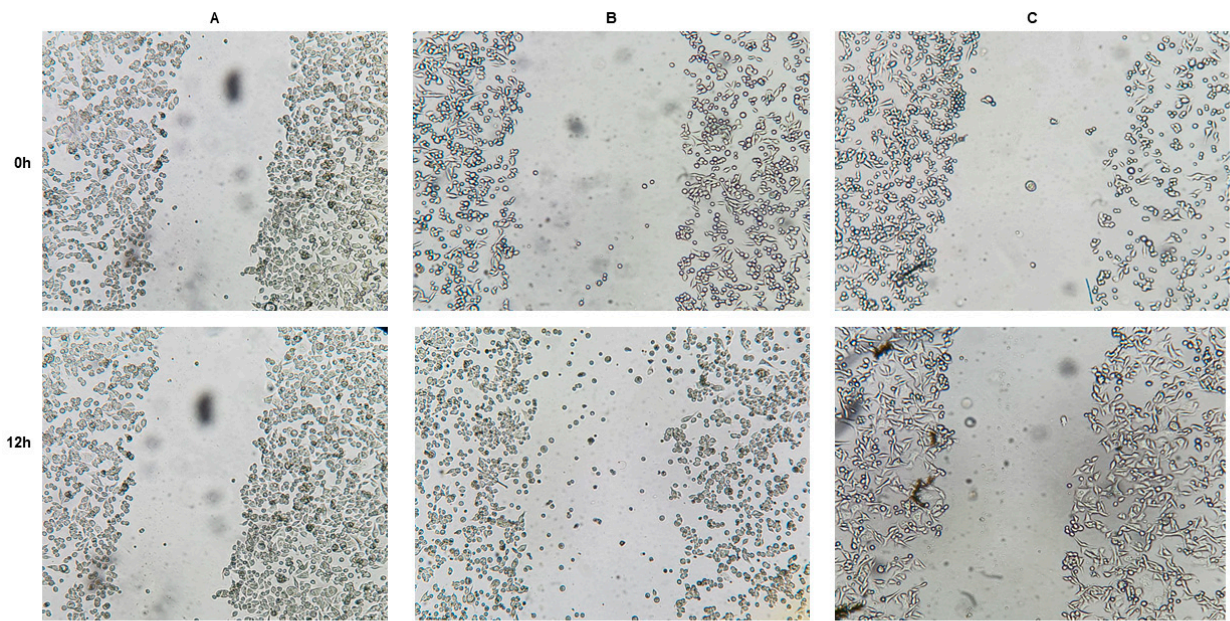

**Figure S1. *Cau* prevents *Hp*(2-20)-induced cell migration.** Cell migration by in vitro scratch assay was performed on AGS cells differently treated: (A) untreated; (B) *Hp*(2-20) 25  $\mu$ M; (C) *Cau* 15  $\mu$ M for 30 minutes and then *Hp*(2-20) 25  $\mu$ M. Cells were incubated for 12 hours and pictures were captured before and after cell incubation.

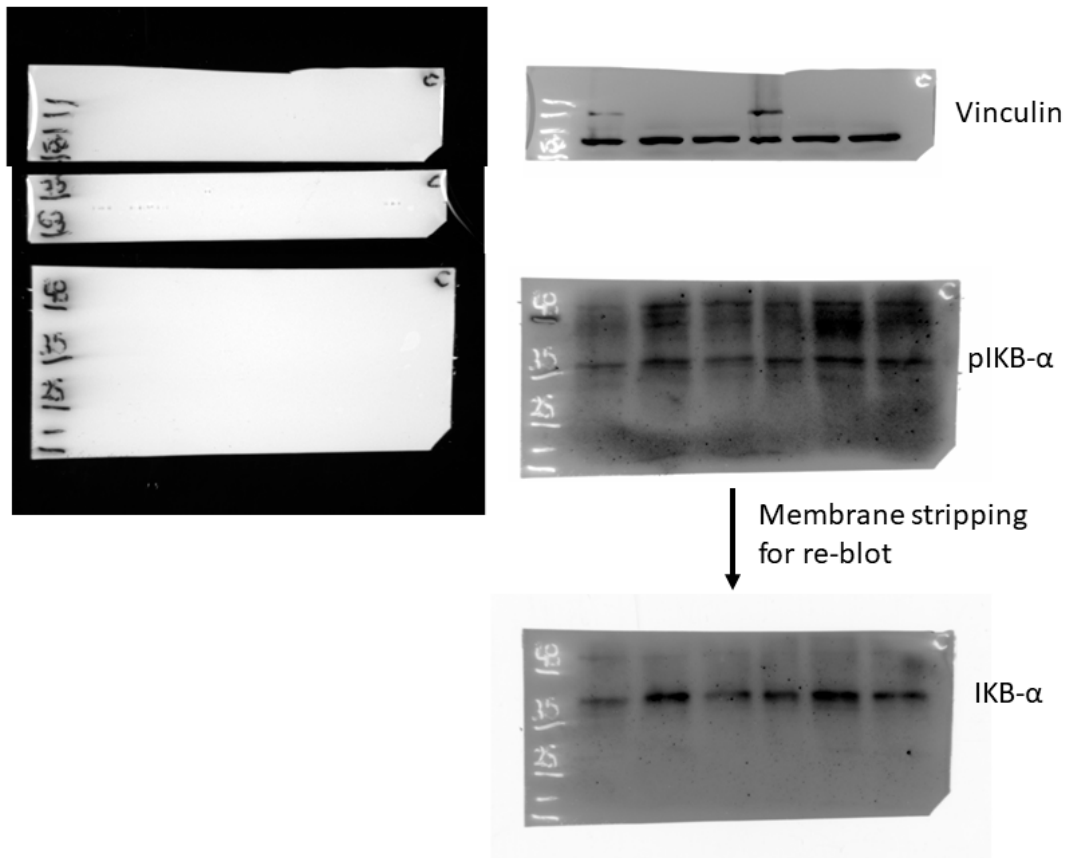

Figure S2. Uncropped and unadjusted Western Blot images corresponding to Figure 2B

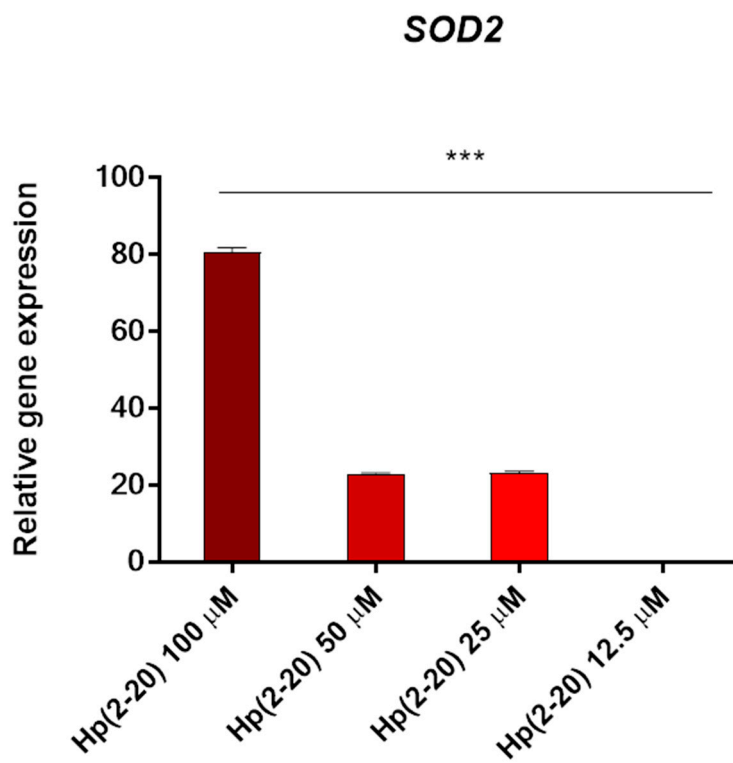

**Figure S3. *Hp(2-20)* increases *SOD2* gene in a dose-dependent manner.** Relative gene expression of *SOD2* by quantitative real-time PCR (qPCR) in cells treated with *Hp(2-20)* at different concentrations, as indicated. All samples were normalized to GAPDH as reference housekeeping gene. Furthermore, relative gene expression was normalized to basal activity (untreated control), in order to obtain relative fold expression. Graphs report the results of at least three independent experiments, represented as means  $\pm$  SD. Statistical analysis was performed by GraphPad Prisma software, using one-way ANOVA followed by Bonferroni post-hoc correction. \*\*\*  $p < 0.0001$ .
